# Supplementary material
Source: PubMed Central journal article supplement (PMC2922150)
Supplement: 1002423107_pnas.201002423SI.pdf [file 1002423107_pnas.201002423SI.pdf]

# Supporting Information

Mazur et al. 10.1073/pnas.1002423107

## SI Materials and Methods

**Histology and Immunohistology.** Specimens were fixed in 4% neutral buffered formaldehyde and embedded in paraffin. Pancreata were sectioned at 3  $\mu\text{m}$  and stained with H&E or used for immunohistochemical studies with antibodies against amylase, insulin (Sigma), CK19 (DSHB), ER, glucagon (Dako), E-cadherin (R&D Systems), PDX1 (gift of C. V. Wright, Vanderbilt University Medical Center, Nashville, TN), HES1 (gift of T. Sudo, Toray Industries Inc., Kamakura, Japan), Myc (Santa Cruz Biotechnology), progesterone receptor (NeoMarkers), and p53 (Novocastra). Staining for mucin content was carried out using a periodic acid–Schiff reaction. X-Gal staining of cryosections (10  $\mu\text{m}$ ) was carried out according to standard protocols, and cryosections were counterstained with nuclear fast red. Double-immunofluorescence was performed using Alexa 488 and Alexa 555 (1:1,000; Invitrogen). Nuclei were stained with DAPI. Pictures were taken using an Axiovert 200M fluorescence inverse microscope (Zeiss) equipped with Axiovision software (Zeiss).

**Histopathological Evaluation.** H&E-stained sections were evaluated by pathologists with expertise in human and mouse PDAC pathology (B.S. and G.K.).

**Western Blot Analysis.** Protein extracts from tissues or cells were obtained using radioimmunoprecipitation assay buffer, separated on standard SDS/PAGE electrophoresis, transferred to nitrocellulose filters, and incubated with antibodies:  $\beta$ -actin (Sigma), Myc, Notch1 (BD Pharmingen), Notch2 (DSHB), Notch3, Notch4, Delta, Jagged (Santa Cruz Biotechnology), and p53 (Novocastra). Antibody binding was visualized using HRP-labeled secondary antibodies and ECL reagent (Amersham).

**Primary Cell Culture and Cell Assays.** Cells were maintained in DMEM medium with 10% (vol/vol) FCS, 1% nonessential amino acids, and 1% penicillin/streptomycin. For TGF- $\beta$  receptor inhibition experiments, the SB431542 inhibitor (Sigma) was used for 48 h at final concentrations of 5 and 10  $\mu\text{M}$ . For migration assays (wound healing), confluent cells were starved with minimal medium (0.5% FCS), scratched with a 20- $\mu\text{L}$  pipette tip to form wounds, and incubated with human recombinant TGF- $\beta$ 1 (R&D Systems) at a final concentration of 5 ng/mL for 48 h. Representative photographs were taken from several high-power fields. Quantification of the wound closure area was performed using Axiovision 4.8 software (Zeiss). Six representative photographs for each time point were analyzed, and the percentage of cell-free area was plotted. For all assays, analysis was performed on low passage number cell lines (fewer than eight passages).

**ChIP.** Experiments were performed using the EZ-ChIP Kit (Upstate). The following antibodies were used: Notch2 (DSHB), RBP-J $\kappa$  (Institute of Immunology Co.), Pol II (Upstate) as a positive control, and IgG as background control. Quantitative PCR was performed on a Lightcycler (Roche) using the primers listed in Table S11. Calculation of average cycle threshold (Ct) and SD for triplicate reactions was performed, and each DNA fraction was normalized to the input to account for chromatin sample preparation differences:  $\Delta\text{Ct}_{\text{normalized ChIP}} = \text{Ct}_{\text{ChIP}} - \text{Ct}_{\text{input}} - \text{Log}_2(\text{dilution})$ , where “dilution” is input dilution factor = 100. Normalized background was then subtracted using the following equation:  $\Delta\Delta\text{Ct} = \Delta\text{Ct}_{\text{normalized ChIP}} - \Delta\text{Ct}_{\text{normalized IgG}}$ . The SD was calculated using propagation of error:  $\text{SD}_{\Delta\Delta\text{Ct}} = \sqrt{\text{SD}_{\text{ChIP}}^2 + \text{SD}_{\text{input}}^2 + \text{SD}_{\text{IgG}}^2}$ .

Calculation of the relative quantity of amplified sequence (fold enrichment) was carried out according to the following equation:  $Q = 2^{-\Delta\Delta\text{Ct}}$ . Calculation of error for relative quantity was carried out according to the following equation:  $Q_{\text{error}\pm} = Q \pm 2^{-(\Delta\Delta\text{Ct} \pm \text{SD}_{\Delta\Delta\text{Ct}})}$ .

**RT-PCR Assay.** RNA was isolated using the Qiagen RNeasy Isolation Kit, followed by cDNA synthesis (SuperScript II; Invitrogen). Real-time PCR was performed with 800-nM primers diluted in a final volume of 20  $\mu\text{L}$  in SYBR Green Reaction Mix (Applied Biosystems). RT-PCR assays were performed as follows: 95  $^{\circ}\text{C}$  for 10 min, followed by 35 cycles of 95  $^{\circ}\text{C}$  for 15 s and 60  $^{\circ}\text{C}$  for 1 min using a LightCycler (Roche). All samples were analyzed in triplicate. Cyclophilin and hypoxanthine guanine phosphoribosyl transferase expression was used for normalization. Primers used are shown in Table S14.

**Mutation Analysis of p53, p16/Ink4a, and Smad4.** RNA isolated from PDAC cell lines (RNeasy Isolation Kit) was used to generate cDNA (Superscript II) for further analysis essentially as described previously (32[1]). Briefly, amplified (with PfuUltra polymerase; Stratagene) p53 and Smad4 gene sequences were cloned into the pCR3.1-TOPO (Invitrogen) plasmid, and p16/Ink4a, p19/Arf was cloned into pBluescript (Stratagene; restriction sites BamHI and HindIII) and sequenced bidirectionally. Three to eight independent clones were sequenced for each cell line.

**Bisulfite Modification and Methylation-Specific PCR Assay.** DNA isolated from primary cancer cells was modified by bisulfite treatment (Invitrogen) and PCR-amplified using primers specific for methylated and unmethylated regions of the 5' UTR of the p16/Ink4a locus. Primers used are listed in Table S11.

**Luciferase Reporter Assay.** A luciferase reporter assay was performed with the following luciferase reporter constructs: Myc-luc, containing three WT *Rbpj* binding sites; Myc-mutA-luc, containing mutated binding site A; Myc-mutAB-luc, including mutated binding sites A and B; and Myc-mutABC-luc, with mutated binding sites A, B, and C. Primary *Kras*; *N2ko* cancer cells were cultured in a six-well plate and transiently transfected in triplicate with luciferase reporter plasmids, N2IC expression plasmids and pRL-TK (internal control reporter; Promega) using Eugene 6 following the manufacturer's instructions (Roche). Luciferase activity was measured with the dual-luciferase reporter assay system (Promega) 48 h after transfection, with the Renilla luciferase activity serving as an internal control. Results are expressed as a percentage of induction over control (100%).

**Gene Chip Analysis and GSEA.** Pancreata of two to four mice per genotype were dissected 7 d postnatally. For analysis of PDAC, six different low-passage (fewer than eight passages) cultured cell lines from *Kras* and *Kras*; *N2ko* PDAC were used. Total RNA was prepared as described above. A total of 1–5  $\mu\text{g}$  of labeled RNA was hybridized to mouse expression gene chip arrays (Mouse Genome 430A 2.0 Array; Affymetrix) according to the manufacturer's protocols. Gene chips were scanned and analyzed using Affymetrix Microarray Suite 5.0 software (MAS 5.0), as described previously (10[2]).

GSEA software was provided by the Broad Institute of the Massachusetts Institute of Technology and Harvard University (<http://www.broad.mit.edu/gsea/>). We acknowledge the use of the GSEA and GSEA software (60). For both gene sets, we used

the default parameters of the GSEA software package, except for the number of permutations ( $n = 1,000$ ).

**Statistical Analyses.** Kaplan–Meier curves were calculated using the survival time for each mouse from all littermate groups (*wt*,

*Kras*, *Kras;N1ko*, and *Kras;N2ko*). The log-rank test was used to test for significant differences between the four groups. For gene expression analysis, the unpaired two-tailed Student's *t* test was used.  $P < 0.05$  was considered significant.

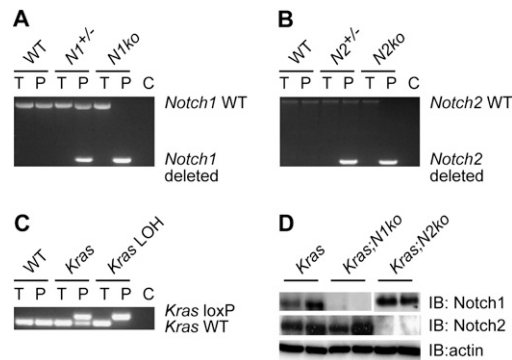

**Fig. S1.** Targeting endogenous *Kras*<sup>G12D</sup> expression and *Notch1* and *Notch2* deletion in the pancreas. (A) Specific PCR analysis of genomic DNA from pancreata (P) but not tails (T) of *N1ko* mice reveals the expected *Notch1* deletion (C = negative control). (B) Specific PCR analysis of genomic DNA from pancreata but not tails of *N2ko* mice reveals the expected *Notch2* deletion. (C) Specific PCR analysis of genomic DNA from pancreata but not tails of *Kras* mice reveals the expected stop cassette removal and *Kras*<sup>G12D</sup> activation. Some pancreata show loss of heterozygosity of the remaining WT *Kras* allele. (D) Western blot analysis confirms *Notch1* and *Notch2* ablation in the pancreas. IB, immunoblot.

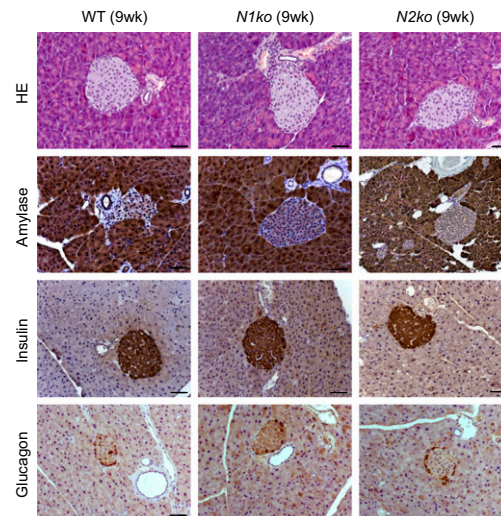

**Fig. S2.** Architectural and functional integrity of the pancreas in 9-wk-old WT, *N1ko*, and *N2ko* animals and in 12-mo-old *N2ko* animals. Immunohistological detection of amylase, insulin, and glucagon reveals no differences between genotypes.

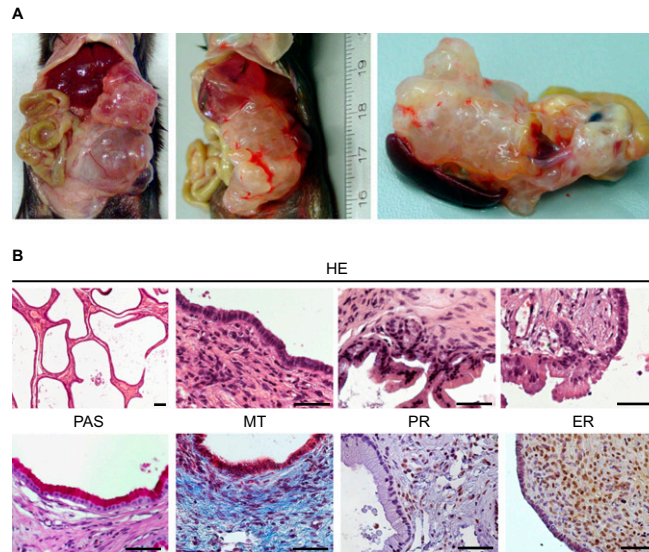

**Fig. S3.** *Kras;N2ko* mice develop cystic lesions resembling human MCN. (A) Typical multilocular cysts develop in the splenic part of the pancreas in aged *Kras;N2ko* mice. (B) Cystic lesions are lined by mucinous columnar epithelium positive by PAS staining, focally demonstrating low to moderate levels of dysplasia (*Top Right*). The surrounding highly cellular stromal compartment has abundant collagen deposits, as indicated by Masson-Trichrome staining (MT) and prominent nuclear expression of progesterone receptor (PR) and/or ER. (Scale bar: 50  $\mu$ m.)

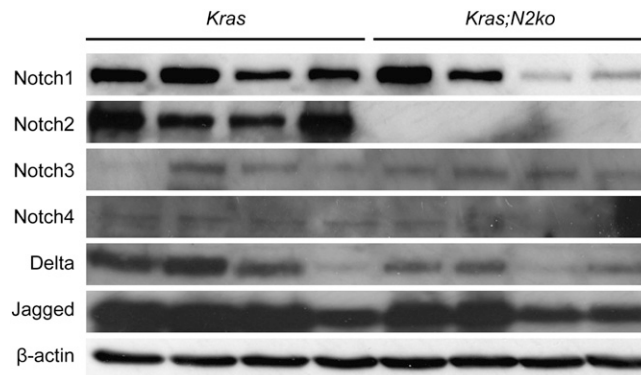

**Fig. S4.** Notch receptor and ligand protein expression in *Kras* and *Kras;N2ko* primary tumor cells.

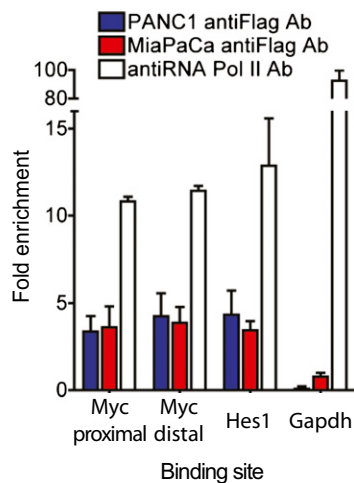

**Fig. 55.** ChIP was performed in human pancreatic cancer cell lines Panc1 and MiaPaCa2. Cells were transiently transfected with pCMV-Notch2-IC-Flag construct, and anti-Flag antibody was used to analyze whether Myc is a direct transcriptional target of Notch2. Quantitative PCR indicates that Notch2 binds to regions proximal and distal in the human *Myc* promoter (corresponding to Myc site A and B + C in the murine promoter, respectively), comparable to a binding site of the *Hes1* promoter. A nonbinding *Gapdh* promoter region and RNA Polymerase III binding serve as controls.

**Table S1.** Immunohistochemical analyses of PanINs, MCN, invasive PDA, and metastases in *Kras* mice

| Marker | PanIN |     |     |     | MCN |     |     |     | Tumor |     |     |     | Metastases |     |     |     |
|--------|-------|-----|-----|-----|-----|-----|-----|-----|-------|-----|-----|-----|------------|-----|-----|-----|
|        | N     | F   | P   | I   | N   | F   | P   | I   | N     | F   | P   | I   | N          | F   | P   | I   |
| TP53   | 5/9   | +++ | ++  | ++  | 2/3 | ++  | ++  | +   | 4/9   | ++  | ++  | +   | 1/3        | +++ | +++ | ++  |
| PDX1   | 9/9   | ++  | ++  | +   | 3/3 | +++ | +++ | ++  | 9/9   | ++  | ++  | +   | 2/3        | +++ | +++ | +++ |
| CK19   | 9/9   | +++ | +++ | ++  | 3/3 | +++ | +++ | +++ | 9/9   | +++ | +++ | ++  | 3/3        | +++ | +++ | +++ |
| E-CAD  | 9/9   | +++ | +++ | ++  | 3/3 | +++ | +++ | +++ | 9/9   | +++ | +++ | ++  | 3/3        | +++ | +++ | +++ |
| HES1   | 9/9   | +++ | +++ | +   | 3/3 | +++ | +++ | +   | 9/9   | +++ | ++  | +   | 3/3        | +++ | ++  | +   |
| MYC    | 8/8   | +++ | +++ | +++ | 2/2 | ++  | ++  | +   | 8/8   | +++ | +++ | +++ | 3/3        | +++ | +++ | +++ |

F, frequency of lesions (or discrete regions of tumor) that scored positive per tissue sample (+, <10%; ++, 10–50%; +++, >50%); I, intensity of expression per positive cell (+, weak; ++, moderate; +++, strong); N, number of tissue samples with positive lesions over total evaluated; P, percentage of cells within a specified lesion that were positive (+ <10%; ++, 10–50%; +++, >50%).

**Table S2.** Immunohistochemical analyses of PanINs, MCN, invasive PDA, and metastases in *Kras;N1ko* mice

| Marker | PanIN |     |     |     | MCN |     |     |     | Tumor |     |     |     | Metastases |   |   |   |
|--------|-------|-----|-----|-----|-----|-----|-----|-----|-------|-----|-----|-----|------------|---|---|---|
|        | N     | F   | P   | I   | N   | F   | P   | I   | N     | F   | P   | I   | N          | F | P | I |
| TP53   | 6/9   | ++  | +   | +   | 2/4 | ++  | +   | +   | 0/7   | n/a | n/a | n/a | n/d        |   |   |   |
| PDX1   | 5/8   | ++  | ++  | +   | 4/4 | ++  | ++  | +   | 2/8   | ++  | ++  | +   | n/d        |   |   |   |
| CK19   | 6/6   | +++ | +++ | ++  | 3/3 | +++ | +++ | +++ | 6/6   | +++ | +++ | ++  | n/d        |   |   |   |
| E-CAD  | 6/6   | +++ | +++ | ++  | 3/3 | +++ | +++ | +++ | 6/6   | +++ | +++ | ++  | n/d        |   |   |   |
| HES1   | 9/9   | +++ | +++ | +   | 4/4 | +++ | +++ | +   | 9/9   | ++  | ++  | +   | n/d        |   |   |   |
| MYC    | 3/3   | +++ | +++ | +++ | n/d |     |     |     | 3/3   | +++ | +++ | +++ | n/d        |   |   |   |

F, frequency of lesions (or discrete regions of tumor) that scored positive per tissue sample (+, <10%; ++, 10–50%; +++, >50%); I, intensity of expression per positive cell (+, weak; ++, moderate; +++, strong); N, number of tissue samples with positive lesions over total evaluated; n/a, not applicable; n/d, not determined; P, percentage of cells within a specified lesion that were positive (+ <10%; ++, 10–50%; +++, >50%).

**Table S3. Immunohistochemical analyses of PanINs, MCN, invasive PDA, and metastases in *Kras;N2ko* mice**

| Marker | PanIN |     |     |     | MCN |     |     |     | Tumor |     |     |    | Metastases |     |     |     |
|--------|-------|-----|-----|-----|-----|-----|-----|-----|-------|-----|-----|----|------------|-----|-----|-----|
|        | N     | F   | P   | I   | N   | F   | P   | I   | N     | F   | P   | I  | N          | F   | P   | I   |
| TP53   | 8/10  | ++  | +   | +   | 5/7 | ++  | ++  | +   | 6/10  | +   | +   | +  | 0/3        | n/a | n/a | n/a |
| PDX1   | 10/10 | +++ | +++ | +++ | 7/7 | +++ | +++ | +++ | 10/10 | +++ | +++ | ++ | 3/3        | +++ | +++ | ++  |
| CK19   | 10/10 | +++ | +++ | +++ | 7/7 | +++ | +++ | +++ | 5/10  | ++  | +   | +  | 1/3        | Z   | ++  | +   |
| E-CAD  | 10/10 | +++ | +++ | +++ | 7/7 | +++ | +++ | +++ | 5/10  | ++  | +   | +  | 1/3        | Z   | ++  | +   |
| HES1   | 10/10 | +++ | +   | +   | 7/7 | ++  | +   | +   | 10/10 | +++ | ++  | +  | 3/3        | +++ | ++  | +   |
| MYC    | 8/8   | ++  | ++  | +   | 5/5 | ++  | ++  | +   | 8/8   | ++  | ++  | +  | 2/2        | ++  | +   | +   |

F, frequency of lesions (or discrete regions of tumor) that scored positive per tissue sample (+, <10%; ++, 10–50%; +++, >50%); I, intensity of expression per positive cell (+, weak; ++, moderate; +++, strong); N, number of tissue samples with positive lesions over total evaluated; n/a, not applicable; P, percentage of cells within a specified lesion that were positive (+ <10%; ++, 10–50%; +++, >50%); Z, presence of stochastic heterogeneity.

**Table S4. Clinical spectrum of disease in *Kras* mice**

| Identification no. | Age, d | MCN  | PDAC  | Histology |      | Liver          | Lung           | Ascites        | Cachexia | Other                                     |
|--------------------|--------|------|-------|-----------|------|----------------|----------------|----------------|----------|-------------------------------------------|
|                    |        |      |       | >50%      | <50% |                |                |                |          |                                           |
| 2190               | 467    | N    | Y     | G         | U, S | Y <sup>M</sup> | Y <sup>M</sup> | Y              | Y        |                                           |
| 4874               | 358    | N    | N     |           |      | N              | N              | N              | N        | Postmortem                                |
| 5630               | 538    | N    | N     |           |      | N              | N              | N              | N        | FAP                                       |
| 9801               | 300    | N    | Y     | G         |      | Y <sup>M</sup> | Y <sup>M</sup> | Y <sup>B</sup> | Y        | LN <sup>M</sup>                           |
| 9425               | 209    | N    | N     |           |      | N              | N              | N              | N        | F                                         |
| 9907               | 444    | N    | Y     | G         |      | Y <sup>M</sup> | N              | N              | N        |                                           |
| 10265              | 603    | N    | Y     | G         |      | Y <sup>M</sup> | Y <sup>M</sup> | N              | N        | F                                         |
| 10266              | 425    | N    | Y     | G         |      | Y <sup>M</sup> |                |                |          | SM                                        |
| 10259              | 269    | N    | N     |           |      |                |                |                |          |                                           |
| 10526              | 523    | Y    | Y     | U         |      | Y <sup>M</sup> | N              | N              | N        |                                           |
| 11752              | 347    | N    | N     |           |      | N              | N              | N              | Y        |                                           |
| 14128              | 482    | Y    | Y     | G         |      | Y <sup>M</sup> | N              | Y <sup>B</sup> | N        | AD, LN <sup>M</sup> , A <sup>m</sup> , SM |
| 17027              | 239    | N    | Y     | G         |      | Y <sup>M</sup> | Y <sup>M</sup> | N              | N        |                                           |
| 17165              | 576    | N    | N     |           |      |                |                | Y              |          | D <sup>inv</sup>                          |
| 17395              | 512    | N    | N     |           |      |                |                |                |          | F                                         |
| 17654              | 335    | N    | N     |           |      | N              | N              | N              | N        |                                           |
| 19476              | 630    | N    | N     |           |      | N              | N              | N              | N        | F, FAP                                    |
| 20283              | 489    | N    | Y     | G         | U    | N              | N              |                |          | Steatosis of liver                        |
| 50709              | 635    | Y    | Y     | G         | U    |                |                |                |          | F                                         |
| 52231              | 427    | N    | N     |           |      | N              | N              | N              | N        | F                                         |
| 54474              | 311    | N    | N     |           |      |                |                |                |          |                                           |
| 510042             | 569    | N    | Y     | G         |      | Y <sup>M</sup> | Y <sup>M</sup> | Y <sup>B</sup> |          | SM                                        |
| 510046             | 330    | N    | N     |           |      | N              | N              | Y <sup>B</sup> | N        | Hemorrhage, Panc necrosis                 |
| 510242             | 421    | N    | Y     | G         |      | N              | N              | N              | N        |                                           |
| 510256             | 293    | N    | Y     | U         | G    | N              | N              | N              | N        | LN <sup>M</sup> , SM                      |
| 610020             | 288    | N    | Y     | G         |      | Y <sup>M</sup> | Y <sup>M</sup> | N              | N        | F                                         |
| Total              |        | 3/26 | 14/26 |           |      | 10/26          | 6/26           | 5/26           | 3/26     |                                           |
| %                  |        | 12%  | 54%   |           |      | 38%            | 23%            | 19%            | 12%      |                                           |

A, adrenal gland; AD, abdominal distention; <sup>B</sup>, bloody ascites; D<sup>inv</sup>, duodenum invasion; F, fibrosis; FAP, fat atrophy of the pancreas; G, glandular; LN, lymph node; <sup>M</sup>, macrometastasis; <sup>m</sup>, micrometastasis; N, no; Panc, pancreas; S, sarcomatoid; SM, splenomegaly (spleen >20 mm); U, undifferentiated; Y, yes.





**Table S7. Characteristics of the stromal compartments of *Kras*, *Kras;N1ko*, and *Kras;N2ko* mice**

| Marker | <i>Kras</i> |   |   | <i>Kras;N1ko</i> |   |   | <i>Kras;N2ko</i> |    |    | <i>Myc ko</i> |    |    |
|--------|-------------|---|---|------------------|---|---|------------------|----|----|---------------|----|----|
|        | N           | P | I | N                | P | I | N                | P  | I  | N             | P  | I  |
| PR     | 8/15        | + | + | 4/11             | + | + | 17/18            | ++ | ++ | 2/2           | ++ | ++ |
| ER     | 0/15        | - | - | 1/11             | + | + | 9/18             | +  | +  | 2/2           | +  | +  |

I, intensity of expression per positive cell (+, weak; ++, moderate); N, number of tissue samples with positive stroma over total evaluated; P, percentage of cells within a stroma that were positive (+, <10%; ++, 10–50%; +++, >50%); PR, progesterone receptor.

**Table S8. Molecular profiles of *Kras* primary pancreatic cancer cell lines**

| Identification no. | p16 |      |         |          | p19 |         |          | p53 |      |         | Smad4 |         |
|--------------------|-----|------|---------|----------|-----|---------|----------|-----|------|---------|-------|---------|
|                    | DNA | mRNA | Protein | Promoter | DNA | Protein | Promoter | DNA | mRNA | Protein | mRNA  | Protein |
| 2190               | del | -    | -       | n/a      | del | -       | n/a      | mut | +    | +       | +     | +       |
| 9801               | del | -    | -       | n/a      | del | -       | n/a      | wt  | +    | -       | +     | +       |
| 17027              | mut | +    | -       | n/a      | n/d | -       | n/d      | wt  | +    | -       | +     | +       |
| 10265              | n/a | n/a  | -       | M        | n/a | -       | M        | n/a | -    | -       | +     | +       |
| 13092              | n/a | n/a  | -       | M        | n/a | -       | M        | mut | +    | -       | +     | +       |

del, deletion; M, methylated; mut, mutation; n/a, not applicable; n/d, not determined; wt, wild type.

**Table S9. Molecular profiles of *Kras;N2ko* primary pancreatic cancer cell lines**

| ID   | p16 |      |         |          | p19 |         |          | p53 |      |         | Smad4 |         |
|------|-----|------|---------|----------|-----|---------|----------|-----|------|---------|-------|---------|
|      | DNA | mRNA | Protein | Promoter | DNA | Protein | Promoter | DNA | mRNA | Protein | mRNA  | Protein |
| 1006 | del | -    | -       | n/a      | del | -       | n/a      | wt  | +    | -       | +     | +       |
| 1009 | mut | +    | -       | U        | mut | -       | n/a      | wt  | +    | -       | +     | +       |
| 1013 | wt  | +    | -       | M        | n/a | -       | M        | wt  | +    | -       | +     | +       |
| 3113 | del | -    | -       | n/a      | del | -       | n/a      | wt  | +    | -       | +     | +       |
| 5112 | n/a | n/a  | -       | M        | n/a | -       | M        | wt  | +    | -       | +     | +       |

del, deletion; M, methylated; mut, mutation; n/a, not applicable; U, unmethylated; wt, wild type.

**Table S10. Top 20 and selected TGF- $\beta$  GSEA signature analysis of *Kras*;N2ko vs. *Kras* in 7-d-old pancreata**

| TGF- $\beta$ signature | No. | Name                          | Size            | ES          | NES         | NOM P value | FDR Q value | FWER P value | Rank at maximum |      |
|------------------------|-----|-------------------------------|-----------------|-------------|-------------|-------------|-------------|--------------|-----------------|------|
| I                      | 1   | VEGF_MMMEC_6HRS_UP            | 63              | -0.73973954 | -2.7084892  | 0           | 0           | 0            | 2449            |      |
|                        | 2   | TGFBETA_ALL_UP                | 122             | -0.6643366  | -2.6893036  | 0           | 0           | 0            | 3697            |      |
| II                     | 3   | TGFBETA_EARLY_UP              | 67              | -0.7087745  | -2.6222773  | 0           | 0           | 0            | 2828            |      |
|                        | 4   | HTERT_DN                      | 88              | -0.67262614 | -2.61393    | 0           | 0           | 0            | 2203            |      |
|                        | 5   | CROONQUIST_RAS_STROMA_DN      | 35              | -0.7753971  | -2.526193   | 0           | 0           | 0            | 1506            |      |
|                        | 6   | CROONQUIST_IL6_STROMA_UP      | 62              | -0.6876837  | -2.5074594  | 0           | 0           | 0            | 2646            |      |
|                        | 7   | VEGF_MMMEC_12HRS_UP           | 40              | -0.7396944  | -2.4997904  | 0           | 0           | 0            | 2703            |      |
|                        | 8   | CMV_ALL_DN                    | 165             | -0.5892903  | -2.4887757  | 0           | 0           | 0            | 3137            |      |
|                        | 9   | CMV_24HRS_DN                  | 115             | -0.60143775 | -2.4474874  | 0           | 0           | 0            | 3137            |      |
|                        | 10  | ADIP_VS_PREADIP_DN            | 61              | -0.6479043  | -2.3746915  | 0           | 0           | 0            | 2203            |      |
|                        | 11  | SANA_TNFA_ENDOTHELIAL_DN      | 129             | -0.5758857  | -2.3746207  | 0           | 0           | 0            | 3153            |      |
|                        | 12  | CORDERO_KRAS_KD_VS_CONTROL_UP | 124             | -0.5773957  | -2.358846   | 0           | 0           | 0            | 3808            |      |
|                        | 13  | VEGF_MMMEC_ALL_UP             | 134             | -0.5670125  | -2.3364904  | 0           | 0           | 0            | 3170            |      |
|                        | 14  | JNK_DN                        | 53              | -0.6561161  | -2.336097   | 0           | 0           | 0            | 1504            |      |
|                        | 15  | EMT_UP                        | 89              | -0.595401   | -2.3324068  | 0           | 0           | 0            | 1812            |      |
|                        | 16  | ADIP_VS_FIBRO_DN              | 45              | -0.6774173  | -2.3317726  | 0           | 0           | 0            | 1704            |      |
|                        | 17  | PASSERINI_EM                  | 52              | -0.65962523 | -2.3163188  | 0           | 0           | 0            | 1188            |      |
|                        | 18  | NI2_MOUSE_UP                  | 68              | -0.62407684 | -2.3120317  | 0           | 0           | 0            | 2273            |      |
|                        | 19  | CMV_HCMV_6HRS_DN              | 86              | -0.5928433  | -2.2827766  | 0           | 0           | 0            | 2639            |      |
|                        | III | 20                            | TGFBETA_LATE_UP | 55          | -0.6278115  | -2.2798045  | 0           | 0            | 0               | 3697 |
|                        | IV  | 27                            | TGFBETA_C1_UP   | 26          | -0.71738595 | -2.1937995  | 0           | 0            | 0               | 3125 |
| V                      | 50  | TGFBETA_C2_UP                 | 21              | -0.7205094  | -2.0788     | 0           | 1.08E-04    | 0.004        | 2481            |      |
| VI                     | 59  | TGFBETA_C3_UP                 | 20              | -0.71528685 | -1.978819   | 0           | 8.68E-04    | 0.038        | 2828            |      |
| VII                    | 103 | TGF_BETA_SIGNALING_PATHWAY    | 73              | -0.47657073 | -1.8012985  | 0           | 0.005866292 | 0.356        | 3045            |      |
| VIII                   | 210 | TGFBETA_C5_UP                 | 28              | -0.50880885 | -1.5387949  | 0.03522505  | 0.04333228  | 1            | 3507            |      |

NOM, nominal; FDR, false discovery rate; FWER, familywise-error rate.

**Table S11. Top 20 and selected TGF- $\beta$  GSEA-signature analysis of *Kras*;N2ko vs. *Kras* in primary cancer cells**

| TGF- $\beta$ signature | No. | Name                                | Size | ES         | NES        | NOM P value | FDR Q value | FWER P value | Rank at maximum |
|------------------------|-----|-------------------------------------|------|------------|------------|-------------|-------------|--------------|-----------------|
| I                      | 1   | BRCA1_SW480_DN                      | 25   | 0.57281667 | 1.6047903  | 0.016260162 | 1           | 0.941        | 4867            |
|                        | 2   | STANELLE_E2F1_UP                    | 37   | 0.5446293  | 1.5969661  | 0.029411765 | 1           | 0.959        | 4800            |
|                        | 3   | ROSS_MLL_FUSION                     | 92   | 0.51262605 | 1.5786657  | 0.013779528 | 1           | 0.976        | 3624            |
|                        | 4   | DFOSB_BRAIN_2WKS_UP                 | 70   | 0.4554071  | 1.5774709  | 0.02258727  | 1           | 0.977        | 3462            |
|                        | 5   | BECKER_ESTROGEN_RESPONSIVE_SUBSET_2 | 16   | 0.7206843  | 1.5664608  | 0.062248997 | 1           | 0.981        | 3974            |
|                        | 6   | PITUITARY_FETAL_UP                  | 20   | 0.5904766  | 1.5654356  | 0.020661157 | 1           | 0.981        | 2282            |
|                        | 7   | TGFBETA_C3_UP                       | 22   | 0.7693509  | 1.557574   | 0.012048192 | 1           | 0.983        | 4837            |
|                        | 8   | PASSERINI_EM                        | 52   | 0.5384598  | 1.5406632  | 0.041420117 | 1           | 0.991        | 4491            |
|                        | 9   | HIPPOCAMPUS_DEVELOPMENT_POSTNATAL   | 93   | 0.40995428 | 1.5284934  | 0.056092843 | 1           | 0.992        | 4648            |
|                        | 10  | MATRIX_METALLOPROTEINASES           | 40   | 0.60774666 | 1.5278989  | 0.025590552 | 1           | 0.992        | 5098            |
|                        | 11  | BCNU_GLIOMA_MGMT_48HRS_DN           | 236  | 0.38457447 | 1.5273094  | 0           | 1           | 0.992        | 3432            |
|                        | 12  | CREB_BRAIN_2WKS_UP                  | 50   | 0.5023513  | 1.5242647  | 0.02892562  | 1           | 0.992        | 5003            |
|                        | 13  | BCNU_GLIOMA_NOMGMT_48HRS_DN         | 39   | 0.53599626 | 1.5200945  | 0.0480167   | 1           | 0.993        | 5916            |
|                        | 14  | CMV_24HRS_DN                        | 120  | 0.5040459  | 1.5176041  | 0.021568628 | 1           | 0.994        | 5554            |
|                        | 15  | P21_ANY_UP                          | 21   | 0.54496384 | 1.5051401  | 0.038934425 | 1           | 1            | 1451            |
|                        | 16  | BRENTANI_CYTOSKELETON               | 36   | 0.49675605 | 1.494601   | 0.04733728  | 1           | 1            | 3546            |
|                        | 17  | TSA_HEPATOMA_CANCER_UP              | 63   | 0.5483822  | 1.4906943  | 0.014141414 | 1           | 1            | 5229            |
|                        | 18  | HOGERKORP_ANTI_CD44_DN              | 17   | 0.619508   | 1.4869046  | 0.02739726  | 1           | 1            | 3159            |
| II                     | 19  | TGFBETA_C2_UP                       | 23   | 0.6331687  | 1.4660585  | 0.058091287 | 1           | 1            | 3449            |
|                        | 20  | AGED_MOUSE_CEREBELLUM_UP            | 87   | 0.40096402 | 1.4480395  | 0.019417476 | 1           | 1            | 3658            |
| III                    | 49  | TGFBETA_C5_UP                       | 29   | 0.5311824  | 1.3228422  | 0.13373253  | 1           | 1            | 2431            |
| IV                     | 60  | TGFBETA_ALL_UP                      | 131  | 0.44838282 | 1.3071258  | 0.13582677  | 1           | 1            | 3449            |
| V                      | 63  | TGFBETA_EARLY_UP                    | 74   | 0.46519884 | 1.3036715  | 0.14741036  | 1           | 1            | 3449            |
| VI                     | 99  | TGFBETA_LATE_UP                     | 57   | 0.4385211  | 1.2246829  | 0.19379845  | 0.9441126   | 1            | 2431            |
| VII                    | 300 | TGF_BETA_SIGNALING_PATHWAY          | 77   | 0.27689424 | 0.90238446 | 0.6062992   | 0.95473385  | 1            | 5197            |



**Table S12. Top 20 and selected Myc GSEA-signature analysis of *Kras* vs. *Kras*;N2ko in 7-day pancreata**

| Myc signature | No. | Name                              | Size | ES         | NES       | NOM P value | FDR Q value | FWER P value | Rank at maximum |
|---------------|-----|-----------------------------------|------|------------|-----------|-------------|-------------|--------------|-----------------|
|               | 1   | ELECTRON_TRANSPORT_CHAIN          | 158  | 0.5342571  | 2.300599  | 0           | 0           | 0            | 4326            |
|               | 2   | TRNA_SYNTHETASES                  | 27   | 0.7419937  | 2.2859864 | 0           | 0           | 0            | 4208            |
| I             | 3   | COLLER_MYC_UP                     | 32   | 0.6781227  | 2.216999  | 0           | 3.84E-04    | 0.002        | 2778            |
|               | 4   | IDX_TSA_UP_CLUSTER5               | 145  | 0.50770676 | 2.158931  | 0           | 8.76E-04    | 0.006        | 4059            |
|               | 5   | LEE_E2F1_DN                       | 78   | 0.53141326 | 2.0727038 | 0           | 0.001649699 | 0.014        | 3441            |
|               | 6   | LEE_DENA_DN                       | 91   | 0.5156025  | 2.0725226 | 0           | 0.001374749 | 0.014        | 1955            |
|               | 7   | IDX_TSA_UP_CLUSTER6               | 257  | 0.4502082  | 2.0651782 | 0           | 0.001441618 | 0.017        | 4497            |
|               | 8   | WELCSH_BRCA_DN                    | 23   | 0.67598593 | 2.0217664 | 0.001945525 | 0.002307167 | 0.03         | 2810            |
|               | 9   | CANTHARIDIN_DN                    | 78   | 0.5077346  | 1.9852358 | 0           | 0.003184209 | 0.047        | 5920            |
| II            | 10  | SCHUMACHER_MYC_UP                 | 87   | 0.48875225 | 1.9593258 | 0           | 0.004319648 | 0.07         | 3945            |
| III           | 11  | ZELLER_MYC_UP                     | 43   | 0.5399944  | 1.8503262 | 0           | 0.015880471 | 0.262        | 2889            |
|               | 12  | CAMPTOTHECIN_PROBCELL_UP          | 34   | 0.56002825 | 1.8316183 | 0           | 0.0168502   | 0.294        | 520             |
|               | 13  | WELCH_GATA1                       | 31   | 0.5687488  | 1.8138825 | 0.004149378 | 0.018689869 | 0.337        | 3743            |
|               | 14  | LIZUKA_G2_GR_G3                   | 49   | 0.4995041  | 1.8052945 | 0.004115226 | 0.019245178 | 0.368        | 2443            |
|               | 15  | FETAL_LIVER_VS_ADULT_LIVER_GNF2   | 82   | 0.46067837 | 1.7911378 | 0           | 0.021657487 | 0.422        | 3410            |
|               | 16  | HSC_INTERMEDIATEPROGENITORS_FETAL | 193  | 0.39740488 | 1.7571981 | 0           | 0.029404327 | 0.542        | 4533            |
|               | 17  | TGZ_ADIP_UP                       | 31   | 0.5390484  | 1.7285321 | 0           | 0.0372291   | 0.66         | 3874            |
|               | 18  | CHAUVIN_ANDROGEN_REGULATED_GENES  | 53   | 0.47623584 | 1.7251784 | 0           | 0.036329415 | 0.672        | 3578            |
|               | 19  | TARTE_PC                          | 121  | 0.41285878 | 1.722183  | 0           | 0.035080407 | 0.68         | 2706            |
|               | 20  | FATTY_ACID_METABOLISM             | 86   | 0.43455413 | 1.7186521 | 0.00212766  | 0.03449751  | 0.695        | 3522            |
| IV            | 23  | LEE_MYC_E2F1_DN                   | 70   | 0.4449714  | 1.6893218 | 0           | 0.040535    | 0.797        | 1955            |
| V             | 46  | LEE_MYC_TGFA_UP                   | 86   | 0.38082185 | 1.4974045 | 0.01594533  | 0.10934354  | 1            | 1104            |
| VI            | 50  | LEE_MYC_TGFA_DN                   | 74   | 0.38602623 | 1.4770054 | 0.027777778 | 0.11692726  | 1            | 3386            |
| VII           | 55  | LEE_MYC_DN                        | 70   | 0.3735229  | 1.4269519 | 0.017699115 | 0.15354133  | 1            | 2455            |
| VIII          | 69  | MYC_TARGETS                       | 71   | 0.34512275 | 1.335033  | 0.042600896 | 0.2337143   | 1            | 2254            |
| IX            | 137 | MENSSSEN_MYC_UP                   | 56   | 0.29244816 | 1.0630429 | 0.3197556   | 0.5902829   | 1            | 2950            |

**Table S13. Top 20 and selected Myc GSEA-signature analysis of *Kras* vs. *Kras*;N2ko in primary cancer cells**

| Myc signature | No. | Name                             | Size | ES          | NES        | NOM P value | FDR Q value | FWER P value | Rank at maximum |
|---------------|-----|----------------------------------|------|-------------|------------|-------------|-------------|--------------|-----------------|
|               | 1   | RADIATION_SENSITIVITY            | 41   | -0.5413243  | -1.7699555 | 0           | 0.6791079   | 0.406        | 345             |
|               | 2   | LIZUKA_L0_GR_L1                  | 20   | -0.63693947 | -1.6705452 | 0.01996008  | 1           | 0.81         | 2738            |
|               | 3   | HIPPOCAMPUS_DEVELOPMENT_PRENATAL | 58   | -0.52234524 | -1.6371815 | 0.013461539 | 1           | 0.9          | 1985            |
|               | 4   | FERRANDO_LYL1_NEIGHBORS          | 23   | -0.5858673  | -1.6352273 | 0.033264033 | 1           | 0.904        | 68              |
|               | 5   | SMITH_HTERT_UP                   | 155  | -0.45070013 | -1.6220243 | 0.00591716  | 0.95484215  | 0.919        | 4327            |
|               | 6   | BYSTRYKH_HSC_BRAIN_CIS_GLOCUS    | 130  | -0.45005926 | -1.6199737 | 0.003752345 | 0.817574    | 0.919        | 4532            |
|               | 7   | CMV_HCMV_TIMECOURSE_18HRS_UP     | 101  | -0.47429216 | -1.6039898 | 0           | 0.81278753  | 0.951        | 5032            |
|               | 8   | YAMA_RECURRENT_HCC_UP            | 26   | -0.6083519  | -1.5693748 | 0.024       | 1           | 0.972        | 68              |
| I             | 9   | COLLER_MYC_UP                    | 33   | -0.64743054 | -1.5649265 | 0.030425964 | 0.93578124  | 0.974        | 4101            |
|               | 10  | DAC_FIBRO_UP                     | 32   | -0.6267182  | -1.5453129 | 0.02892562  | 1           | 0.98         | 434             |
| II            | 11  | ZELLER_MYC_UP                    | 46   | -0.54964083 | -1.5182744 | 0.046511628 | 1           | 0.989        | 1941            |
|               | 12  | BYSTRYKH_HSC_CIS_GLOCUS          | 229  | -0.36202464 | -1.5155611 | 0           | 1           | 0.989        | 4357            |
| III           | 13  | MYC_TARGETS                      | 74   | -0.50701964 | -1.508564  | 0.07170542  | 1           | 0.991        | 4478            |
|               | 14  | UVC_HIGH_D2_DN                   | 57   | -0.45448267 | -1.4786458 | 0.041501977 | 1           | 0.998        | 3948            |
|               | 15  | STEMCELL_COMMON_UP               | 315  | -0.4237171  | -1.4669318 | 0.05511811  | 1           | 0.998        | 6368            |
|               | 16  | HDACI_COLON_SUL24HRS_UP          | 105  | -0.43819037 | -1.4586589 | 0.050403226 | 1           | 0.998        | 5993            |
|               | 17  | HDACI_COLON_CLUSTER10            | 50   | -0.41208372 | -1.4579145 | 0.017307693 | 1           | 0.998        | 4566            |
|               | 18  | HDACI_COLON_CLUSTER5             | 37   | -0.44846    | -1.4569557 | 0.028985508 | 1           | 0.998        | 3738            |
|               | 19  | VENTRICLES_UP                    | 307  | -0.3362042  | -1.4472296 | 0.044624746 | 1           | 0.998        | 4557            |
|               | 20  | UVB_NHEK2_DN                     | 160  | -0.32544827 | -1.4116431 | 0.020449897 | 1           | 1            | 5077            |
| IV            | 25  | SCHUMACHER_MYC_UP                | 92   | -0.43308792 | -1.3953692 | 0.12645914  | 1           | 1            | 3422            |
| V             | 127 | LEE_MYC_UP                       | 95   | -0.28379893 | -1.1302445 | 0.29492188  | 0.9526402   | 1            | 3889            |
| VI            | 321 | LEE_MYC_TGFA_UP                  | 88   | -0.24205469 | -0.7627981 | 0.7643312   | 1           | 1            | 4431            |
| VII           | 342 | FERNANDEZ_MYC_TARGETS            | 280  | -0.17656198 | -0.727881  | 0.91581106  | 1           | 1            | 4997            |
| VIII          | 361 | MENSSSEN_MYC_UP                  | 57   | -0.23652063 | -0.6912166 | 0.8199234   | 1           | 1            | 7119            |
